# Supplementary material for: Molecular assembly with a figure-of-eight nanohoop as a strategy for the collection and stabilization of cyclo[18]carbon
Source: Royal Society of Chemistry journal article supplement (doi:10.1039/d3cp01896b), 2023-01-01
Supplement: d3cp01896b2.pdf [file d3cp01896b2.pdf]

## Supplementary Material

### **Molecular assembly with figure-of-eight nanohoop as a strategy for collection and stabilization of cyclo[18]carbon**

*Zeyu Liu, <sup>\*a</sup> Xia Wang, <sup>a</sup> Tian Lu, <sup>\*b</sup> Jiaojiao Wang, <sup>a</sup> Xiufen Yan, <sup>a</sup> Yang Wu, <sup>a</sup> and  
Jingbo Xu*

<sup>a</sup>School of Environmental and Chemical Engineering, Jiangsu University of Science  
and Technology, Zhenjiang 212100, People's Republic of China

<sup>b</sup>Beijing Kein Research Center for Natural Sciences, Beijing 100022, People's  
Republic of China

## Contents:

|                                                                                                                                                         |     |
|---------------------------------------------------------------------------------------------------------------------------------------------------------|-----|
| <b>Section S1.</b> Computational details.....                                                                                                           | S3  |
| <b>Fig. S1.</b> Simplified model for calculations of interaction energy between C <sub>18</sub> and OPP.....                                            | S4  |
| <b>Fig. S2.</b> Conformational superpositions of the minimum structure of 2C <sub>18</sub> @OPP optimized by DFT with that calculated by FF method..... | S6  |
| <b>Section S2.</b> Detailed information about the geometric characters of C <sub>18</sub> @OPP and 2C <sub>18</sub> @OPP.....                           | S8  |
| <b>Table S1</b> Included angle between average planes of each part in complexes C <sub>18</sub> @OPP and 2C <sub>18</sub> @OPP.....                     | S8  |
| <b>Fig. S3.</b> Conformational superpositions of the free and composite states of (a) C <sub>18</sub> ring and (b) OPP macrocycle.....                  | S9  |
| <b>Table S2</b> Natural population charges of each part in complexes C <sub>18</sub> @OPP and 2C <sub>18</sub> @OPP.....                                | S10 |
| <b>Section S3.</b> Spectral characteristics of complexes C <sub>18</sub> @OPP and 2C <sub>18</sub> @OPP.....                                            | S11 |
| <b>Fig. S4.</b> (a) IR spectroscopy and (b) UV-Vis spectrum of OPP, C <sub>18</sub> @OPP, and 2C <sub>18</sub> @OPP.....                                | S11 |
| <b>Fig. S5.</b> Interaction energy between C <sub>18</sub> and OPP during simulation of spontaneous entrance of two C <sub>18</sub> into OPP.....       | S13 |
| <b>Fig. S6.</b> ESP colored vdW surface map of the OPP.....                                                                                             | S14 |
| <b>Fig. S7.</b> Isosurface map of HOMO and LUMO+8 of 2C <sub>18</sub> @OPP under its S <sub>1</sub> state structure with isovalue of 0.02 a.u.....      | S15 |
| <b>Fig. S8.</b> Conformational superpositions of the minimum structure of the S <sub>0</sub> and S <sub>1</sub> states of 2C <sub>18</sub> @OPP.....    | S16 |
| <b>Fig. S9.</b> Isosurface map of IGMH of S <sub>1</sub> state of 2C <sub>18</sub> @OPP with $\delta g^{\text{inter}}$ isovalue of 0.002 a.u.....       | S17 |

## Section S1. Computational details

Due to the extremely unusual electronic structure of  $C_{18}$ , special attention should be paid to the selection of computing methods for it. Many theoretical studies have demonstrated that hybrid density functional containing more than 25% global Hartree-Fock (HF) exchange, such as M06-2X,<sup>S1</sup> or containing very high HF exchange at long-range region, such as  $\omega$ B97XD,<sup>S2</sup> combined with at least 6-311G(d) basis set,<sup>S3</sup> can replicate its polyynic structure with alternating long and short bonds.<sup>S4-S6</sup> In contrast, it is generally accepted that the geometry of organic conjugated macrocycles is insensitive to the level of basis set. Therefore, we adopted the  $\omega$ B97XD method combined with 6-311G(d) (for free and composited  $C_{18}$  ring) and 6-31G(d)<sup>S7</sup> (for other molecules and composited parts) basis sets to optimize all species discussed. The vibrational frequencies obtained at the same theoretical level were used to characterize the stationary point as energy minima.

Intermolecular interaction between  $C_{18}$  and OPP was evaluated using  $\omega$ B97M-V<sup>S8</sup> functional in combination with def2-QZVPP basis set,<sup>S9</sup> because this level is able to accurately estimate interaction energy ( $E_{\text{int}}$ ) for a wide variety of weakly interacting complexes.<sup>S10</sup> However, this calculation is too computationally demanding to handle the entire complexes  $C_{18}@\text{OPP}$  and  $2C_{18}@\text{OPP}$ . Considering that the interatomic interaction between  $C_{18}$  and OPP decays rapidly with distance, and that the morphology of the loop complexed with  $C_{18}$  is basically unaffected by another loop, the OPP was simplified to retain only one loop in the calculation of  $E_{\text{int}}$  (see **Fig. S1** for illustration). The binding enthalpy of  $C_{18}@\text{OPP}$  was evaluated as  $\Delta H_{\text{b}} = E_{\text{int}} + \Delta H_{\text{b}}^{\text{corr}}$ , where  $\Delta H_{\text{b}}^{\text{corr}}$  is the variation of thermal correction to enthalpy during binding.  $\Delta H_{\text{b}}^{\text{corr}}$  and entropy were calculated based on harmonic frequencies by Shermo code with Grimme's quasi-rigid-rotor harmonic oscillator model.<sup>S11</sup> The deformation energy of  $C_{18}$  and OPP representing the energy increase due to structure distortion during complexation were not considered explicitly, because their magnitudes are completely negligible, which can be learned from the discussion of the configuration superposition in the main text.

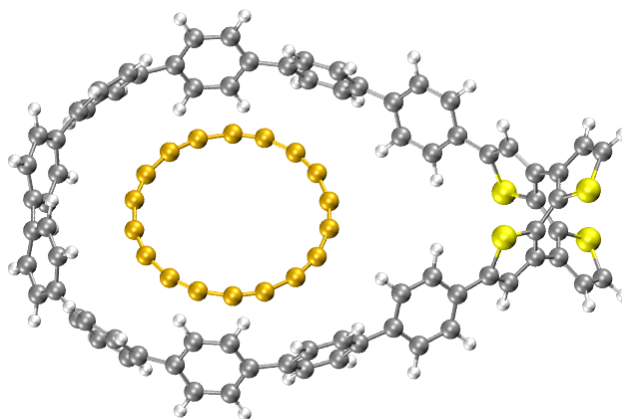

**Fig. S1.** Simplified model for calculations of interaction energy between  $C_{18}$  and OPP. One loop of OPP is removed and the truncated C-C bonds are saturated with hydrogens. Coordinates of all atoms except for the newly added hydrogens are in line with those in the  $C_{18}@OPP$  complex optimized at  $\omega B97XD/6-311G(d)&6-31G(d)$  level.

In order to calculate binding energy between  $C_{18}$  and OPP at  $S_1$  excited state, we optimized minimum structure of  $S_1$  state of  $2C_{18}@OPP$  and OPP via time-dependent density functional theory (TD-DFT) using the same DFT functional and basis set as aforementioned ground-state calculations, and then the binding energy was calculated as

$$\Delta E_{\text{bind}}^{S_1} = E[(C_{18} @ OPP)_{S_1, \text{model}}] - E[(OPP)_{S_1, \text{model}}] - E[(C_{18})_{S_0}]$$

where the first term at the right-hand side is the energy of  $C_{18}@OPP$  based on simplified model of optimized  $S_1$  geometry of  $2C_{18}@OPP$ , the second term is the energy of OPP based on simplified model of optimized  $S_1$  geometry of OPP, and the third term is the energy of  $C_{18}$  optimized at its isolated geometry. The energies were evaluated using  $\omega B97M-V/\text{def2-QZVPP}$  level. Because the  $S_1$  state of  $2C_{18}@OPP$  fully corresponds to a local excitation at the central linker of OPP, consideration of excitation of  $C_{18}$  is completely avoided. Also due to this reason and only the loop regions of OPP have notable interaction with  $C_{18}$ , it is fully reasonable to calculate the binding energy between  $C_{18}$  and OPP in  $S_1$  state via ground-state theoretical method ( $\omega B97M-V$ ). So, the binding energy between  $C_{18}$  and OPP at ground state was calculated in the same way, except that all geometries were optimized at ground state.

The excitation energies and oscillator strengths were calculated with the TD-DFT using PBE38 functional with the same choice of basis sets as the geometric

optimization. The PBE38 is a hybrid density functional built based on the very popular PBE0<sup>S12</sup> by increasing its HF exchange from 25% to 3/8 (37.5%). We employ it because it is shown that PBE38 is quite satisfactory for studying excited states for organic systems with extensive  $\pi$ -conjugation like OPP,<sup>S13</sup> and its relatively high HF exchange guarantees that electronic structure of C<sub>18</sub> can be correctly represented. All quantum chemistry calculations were carried out by Gaussian 16 (A.03) software,<sup>S14</sup> except that  $\omega$ B97M-V single-point calculations were conducted using ORCA 5.0.3 program.<sup>S15</sup>

MD simulation was realized by GROMACS 2018.8 program<sup>S16</sup> basically based on general amber force field (GAFF).<sup>S17</sup> Specifically, for representing C<sub>18</sub>, c1 atom type (suitable for *sp*-hybridized carbon) was assigned for the carbons, and c1-c1-c1 angle parameter was employed. Parameters of long and short C-C bonds in C<sub>18</sub> were respectively generated by modified Seminario method<sup>S18</sup> based on Hessian matrix at  $\omega$ B97XD/def2-TZVP level. For representing OPP, proper GAFF atom types and corresponding bond, angle, and dihedral parameters were assigned. However, we found the rigid structure of cyclooctatetrathiophene linker region between the two loops of OPP cannot be well maintained via GAFF bonded parameters during MD simulation, therefore the bonded parameters related to this region were produced by modified Seminario method based on Hessian matrix at  $\omega$ B97XD/6-311G(d) level. The assignment of GAFF parameter, the modified Seminario calculation, and the generation of final GROMACS topology files were finished by Sobtop code.<sup>S19</sup>

We superimposed the structure of 2C<sub>18</sub>@OPP calculated by FF method with that optimized by DFT, and the result shows that the geometric structure of the supramolecular complex obtained by the two methods is not significantly different (**Fig. S2**). The comparison results of structure and energy jointly demonstrate the reliability of the molecular FF and computational strategy we have chosen. Energy decomposition based on GAFF was also employed to study intermolecular interaction for 2C<sub>18</sub>@OPP. Only van der Waals (vdW) interaction was taken into account because atomic charges of C<sub>18</sub> are all close to zero and thus electrostatic interaction cannot be represented. The interaction energy between each pair of C<sub>18</sub> and OPP derived in this way is -26.0 kcal/mol, which is close to the  $\omega$ B97M-V/def2-QZVPP result of -20.3 kcal/mol.

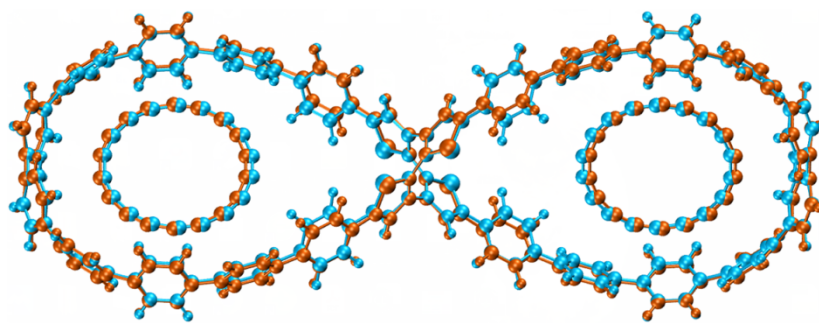

**Fig. S2.** Conformational superpositions of the minimum structure of  $2C_{18}@OPP$  optimized by DFT with that calculated by FF method. Color code: blue, DFT-optimized structure; orange, FF-calculated structure.

To simulate the formation of  $2C_{18}@OPP$ , we constructed a box containing a large vacuum region by extending 4 nm around the OPP, and then inserted two  $C_{18}$  molecules at random positions with arbitrary orientations. MD simulation for 2 ns was performed at a maintaining temperature of 300 K via velocity rescale thermostat.<sup>S20</sup> Initial atomic velocities were randomly generated according to Maxwell distribution corresponding to actual simulation temperature. The periodic boundary condition was adopted to ensure that  $C_{18}$  could re-enter the box when it moves out. The translational and angular motions of the OPP were eliminated during the simulation, thus keeping the OPP always centered in the box. In the MD simulation, time step was set to 2 fs and trajectory snapshots were saved every 0.2 ps. Because atomic charges of  $C_{18}$  are all zero due to its structure symmetry, electrostatic interaction was not taken into account in the simulation. Ignoring it is acceptable since the  $C_{18}\cdots OPP$  interaction is dominated by vdW effect, as discussed in the main text.

In our five 5 ns MD simulations of  $C_{18}@OPP$  at each temperature of 100, 200, 300, 400, and 500 K, as well as a 20 ns simulation at 500, 600, and 800 K respectively, the employed simulation conditions are the same as those described above.

Electrostatic potential (ESP), van der Waals (vdW) potential, Mayer bond order, and independent gradient model based on Hirshfeld partition (IGMH) analyses were all finished by Multiwfn 3.8(dev) code.<sup>S21</sup> All isosurface and molecular structure maps were rendered by VMD software.<sup>S22</sup>

## Notes and references

(S1) Zhao, Y.; Truhlar, D. G. *Theor. Chem. Acc.* **2008**, *120*, 215–241.

- (S2) Chai, J. D.; Head-Gordon, M. *Phys. Chem. Chem. Phys.* **2008**, *10*, 6615–6620.
- (S3) Hehre, W. J.; Ditchfield, R.; Pople, J. A. *J. Chem. Phys.* **1972**, *56*, 2257.
- (S4) Liu, Z.; Lu, T.; Chen, Q. *Carbon* **2020**, *165*, 468–475.
- (S5) Baryshnikov, G. V.; Valiev, R. R.; Kuklin, A. V.; Sundholm, D.; Ågren, H. *J. Phys. Chem. Lett.* **2019**, *10*, 6701–6705.
- (S6) Liu, Z.; Lu, T.; Chen, Q. *J. Mol. Model.* **2021**, *27*, 42.
- (S7) Krishnan, R.; Binkley, J. S.; Seeger, R.; Pople, J. A. *J. Chem. Phys.* **1980**, *72*, 650.
- (S8) Mardirossian, N.; Head-Gordon, M. *J. Chem. Phys.* **2016**, *144*, 214110.
- (S9) Weigend, F.; Ahlrichs, R. *Phys. Chem. Chem. Phys.* **2005**, *7*, 3297–3305.
- (S10) Mardirossian, N.; Head-Gordon, M. *Mol. Phys.* **2017**, *115*, 2315–2372.
- (S11) Lu, T.; Chen, Q. *Comput. Theor. Chem.* **2021**, *1200*, 113249.
- (S12) Perdew, J. P.; Burke, K.; Ernzerhof, M. *Phys. Rev. Lett.* **1996**, *77*, 3865–3868.
- (S13) Goerigk, L.; Grimme, S. *J. Chem. Phys.* **2010**, *132*, 184103.
- (S14) Frisch, M. J.; Trucks, G. W.; Schlegel, H. B.; Scuseria, G. E.; Robb, M. A.; Cheeseman, J. R.; et al. *Gaussian 16*, revision A.03; Gaussian, Inc.: Wallingford, CT, **2016**.
- (S15) Frank Neese. *WIREs: Comp. Mol. Sci.* **2022**, e1606.
- (S16) Abrahama, M. J.; Murtola, T.; Schulz, R.; Páll, S.; Smith, J. C.; Hess, B.; Lindahl, E. *SoftwareX* **2015**, *1–2*, 19–25.
- (S17) Wang, J.; Wolf, R. M.; Caldwell, J. W.; Kollman, P. A.; Case, D. A. *J. Comput. Chem.* **2004**, *25*, 1157–1174.
- (S18) Allen, A. E. A.; Payne, M. C.; Cole, D. J. *J. Chem. Theory Comput.* **2018**, *14*, 274–281.
- (S19) Lu, T. <http://sobereva.com/soft/Sobtop> (accessed on May 1, **2022**).
- (S20) Bussi, G.; Donadio, D.; Parrinello, M. *J. Chem. Phys.* **2007**, *126*, 014101.
- (S21) Lu, T.; Chen, F. *J. Comput. Chem.* **2012**, *33*, 580–592.
- (S22) Humphrey, W.; Dalke, A.; Schulten, K. *J. Mol. Graphics.* **1996**, *14*, 33–38.

**Section S2.** Detailed information about the geometric characters of C<sub>18</sub>@OPP and 2C<sub>18</sub>@OPP

The orientation of guest C<sub>18</sub> in the complexes almost coincides with the plane of the loop containing it, and the included angle is only slightly greater than 2.0° (**Table S1**). The angle between two loops of the host OPP in two complexes still remains about 70.0° as that in its free state, making the dihedral angle between two guests C<sub>18</sub> in 2C<sub>18</sub>@OPP as high as about 65.0°. It is also found that the OPP is separated from the encapsulated C<sub>18</sub> by a distance of 3.8 Å in C<sub>18</sub>@OPP and 2C<sub>18</sub>@OPP, which just between the corresponding values of C<sub>70</sub>@[10]CPP (3.4–3.8 Å) and C<sub>70</sub>@[11]CPP (3.8–4.2 Å) and is close to the distance maintained by van der Waals (vdW) interaction between graphite sheets (3.4 Å).<sup>S23</sup> Therefore, there should be a considerable degree of vdW attraction between C<sub>18</sub> and OPP in the complexes.

**Table S1** Included angle between average planes of each part in complexes C<sub>18</sub>@OPP and 2C<sub>18</sub>@OPP. The values are given in °.

|                       | loop-1/loop-2 | C <sub>18</sub> -1/loop-1 | C <sub>18</sub> -2/loop-2 | C <sub>18</sub> -1/C <sub>18</sub> -2 |
|-----------------------|---------------|---------------------------|---------------------------|---------------------------------------|
| OPP                   | 70.39         | /                         | /                         | /                                     |
| C <sub>18</sub> @OPP  | 69.61         | 2.18                      | /                         | /                                     |
| 2C <sub>18</sub> @OPP | 68.92         | 2.11                      | 2.11                      | 64.70                                 |

**Notes and references**

(S23) Yuan, K.; Guo, Y. J.; Zhao, X. *J. Phys. Chem. C* **2015**, *119*, 5168–5179.



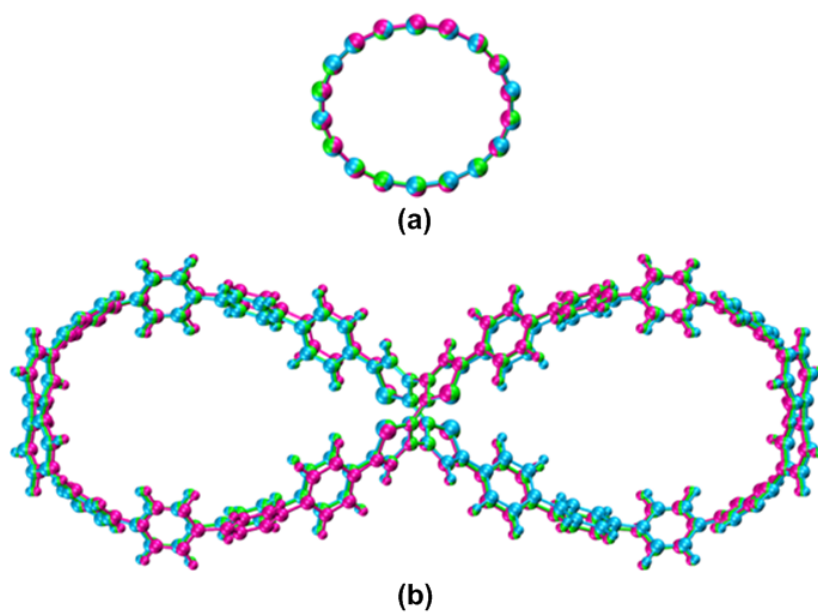

**Fig. S3.** Conformational superpositions of the free and composite states of (a) C<sub>18</sub> ring and (b) OPP macrocycle. Color code: red, free host and guest molecules; green, host and guest moieties of C<sub>18</sub>@OPP; blue, host and guest moieties of 2C<sub>18</sub>@OPP.

**Table S2** Natural population charges of each part in complexes  $C_{18}@OPP$  and  $2C_{18}@OPP$ . The values are given in  $e$ .

|               | $C_{18}-1$ | $C_{18}-2$ | loop-1 | loop-2 |
|---------------|------------|------------|--------|--------|
| $C_{18}@OPP$  | -0.03      | /          | 0.03   | 0.00   |
| $2C_{18}@OPP$ | -0.03      | -0.03      | 0.03   | 0.03   |

### Section S3. Spectral characteristics of complexes $C_{18}@OPP$ and $2C_{18}@OPP$

The IR spectroscopies of OPP,  $C_{18}@OPP$ , and  $2C_{18}@OPP$  appear similar in most regions (**Fig. S4(a)**), but there are three significant differences: (1) The introduction of  $C_{18}$  does not affect the wavenumber of the very strong IR absorption at  $798.1\text{ cm}^{-1}$ , but there is a conspicuous enhancement of the absorption intensity with the addition of  $C_{18}$ . (2) The addition of  $C_{18}$  introduces a remarkable IR absorption at  $379.6\text{ cm}^{-1}$ , and the more  $C_{18}$  is bound the stronger the spectroscopic intensity at this wavenumber. This absorption was observed to come entirely from the in-plane C-C-C bending vibrations of the  $C_{18}$  bound in loops. (3) The complexation of  $C_{18}$  with OPP also leads to a detectable absorption at  $2122.0\text{ cm}^{-1}$ , which we found to be caused by the C-C bond stretching vibrations of the  $C_{18}$  ring.

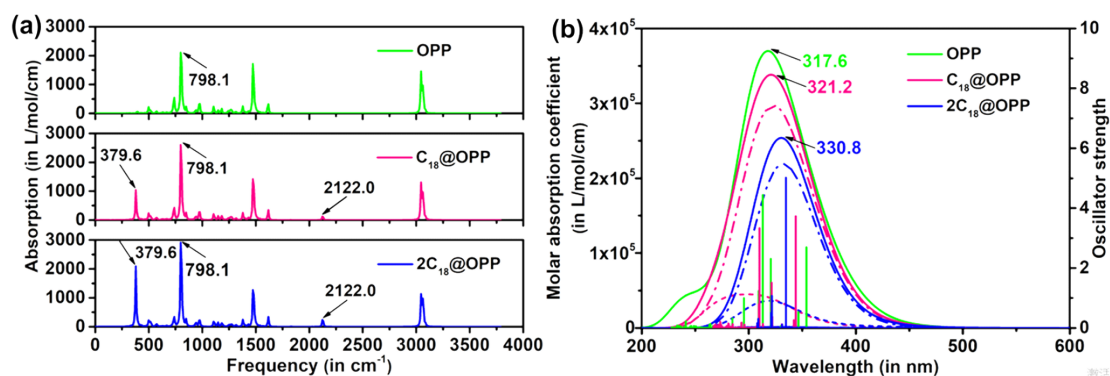

**Fig. S4.** (a) IR spectroscopy and (b) UV-Vis spectrum of OPP,  $C_{18}@OPP$ , and  $2C_{18}@OPP$ . The Lorentz and Gaussian functions with half-width at half height of 5.0 and  $3000.0\text{ cm}^{-1}$  were employed for broadening the theoretical data as IR spectroscopy and UV-Vis spectrum, respectively. A fundamental scale factor of 0.949 was applied for all vibrational frequencies. The dash-dot and short-dash curves represent CTSs caused by electron transition within OPP and that from OPP to  $C_{18}$ , respectively, and other forms of electron excitation, that is, those from  $C_{18}$  to OPP and within  $C_{18}$ , are almost undetectable.

The excitation energies and oscillator strengths of the first 100 low-lying excited states of OPP,  $C_{18}@OPP$ , and  $2C_{18}@OPP$  were calculated, and the simulated UV-Vis spectra were plotted accordingly (**Fig. S4(b)**). The results of vertical excitation show that the only absorption of nanoring OPP centered at 317.6 nm is reasonably consistent with the experimental observation (342.0 nm).<sup>S24</sup> A slight red-shift in absorption bands is observed with a significant reduction in absorption intensity after

the complexation of host and guest molecules. Importantly, the electronic absorption spectra of complexes  $C_{18}@OPP$  and  $2C_{18}@OPP$  with different numbers of guest show distinctive characteristics, that is, the maximum absorption peak of  $2C_{18}@OPP$  with one more guest seems to have more red-shift and weaker intensity. As can be seen from charge-transfer spectrum (CTS) analysis proposed by us (see Supplementary Material of reference S25 for details), the absorption spectra of the two complexes are almost entirely derived from the electron redistribution within OPP and the charge transfer from OPP to  $C_{18}$ . So, the  $C_{18}$  plays a certain role in the electron excitation of the complexes, which is the fundamental reason why complexation makes the UV-Vis spectrum of the system change notably.

### Notes and references

- (S24) Zhan, L.; Dai, C.; Zhang, G.; Zhu, J.; Zhang, S.; Wang, H.; Zeng, Y; Tung, C-H; Wu, L-Z; Cong, H. *Angew. Chem. Int. Ed.* **2022**, *61*, e202113334.
- (S25) Z. Liu, X. Wang, T. Lu, A. Yuan, X. Yan, *Carbon* **2022**, *187*, 78–85.

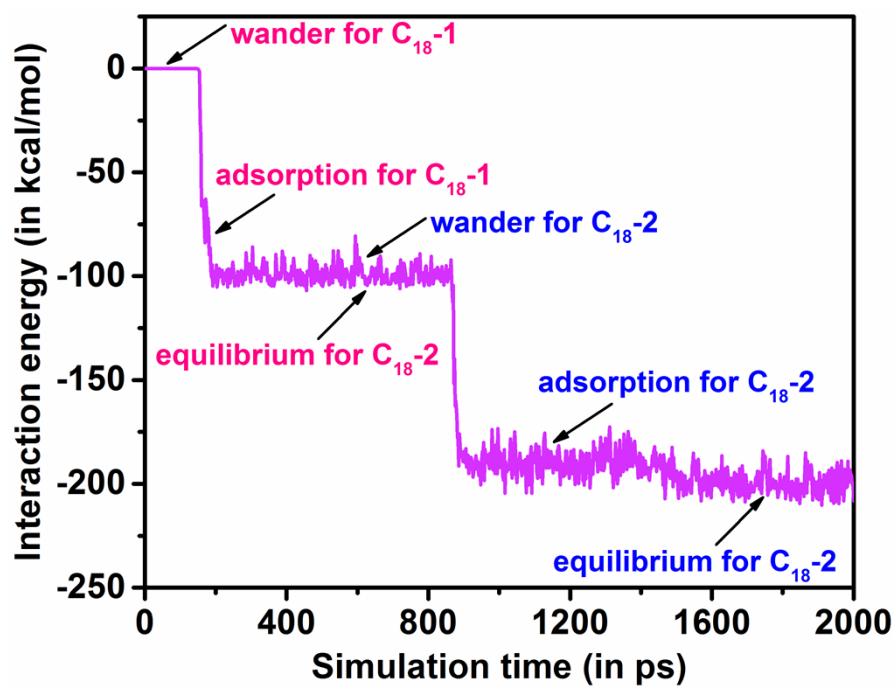

**Fig. S5.** Interaction energy between C<sub>18</sub> and OPP during simulation of spontaneous entrance of two C<sub>18</sub> into OPP.

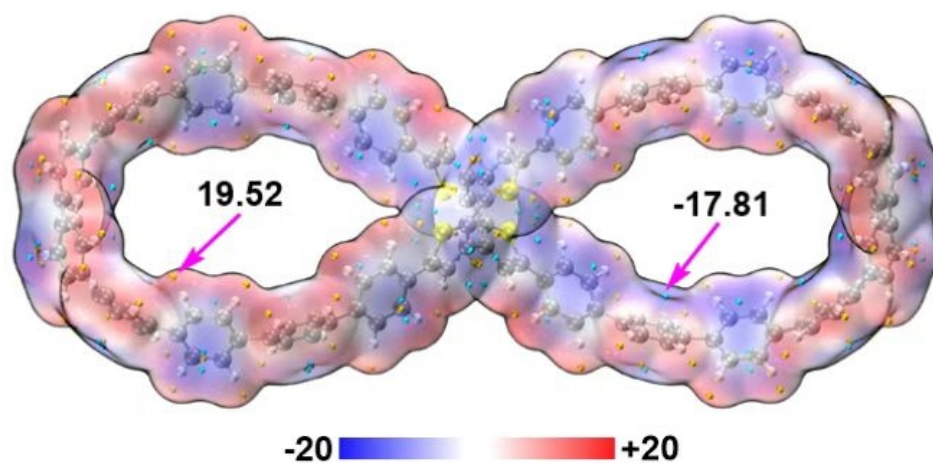

**Fig. S6.** ESP colored vdW surface map of the OPP. Values of selected ESP minima and maxima on the surface are labelled. The labels and color scale are given in kcal/mol/e.

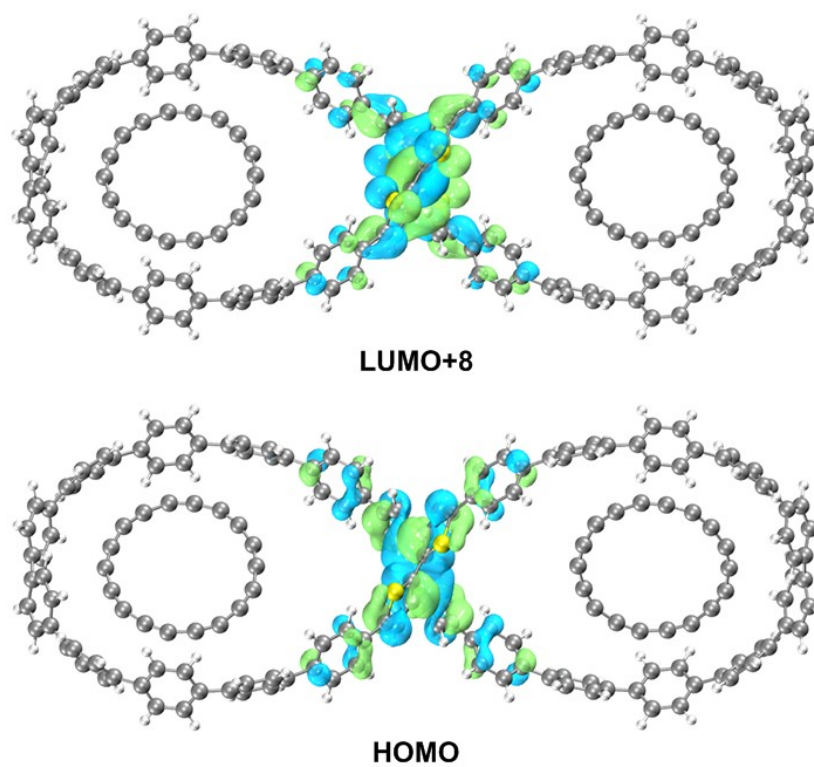

**Fig. S7.** Isosurface map of HOMO and LUMO+8 of 2C<sub>18</sub>@OPP under its S<sub>1</sub> state structure with isovalue of 0.02 a.u.

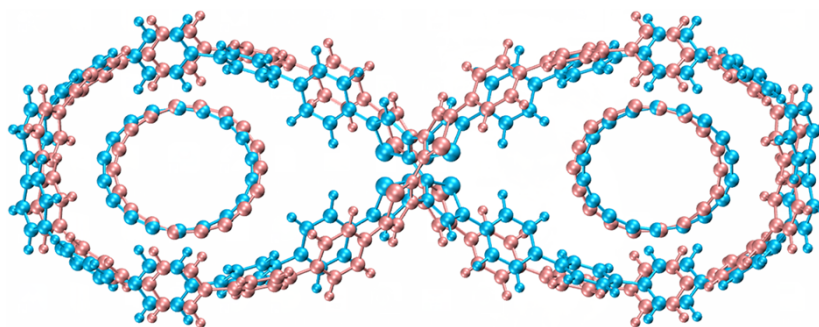

**Fig. S8.** Conformational superpositions of the minimum structure of the  $S_0$  and  $S_1$  states of  $2C_{18}@OPP$ . Color code: blue, the  $S_0$  state structure; pink, the  $S_1$  state structure.



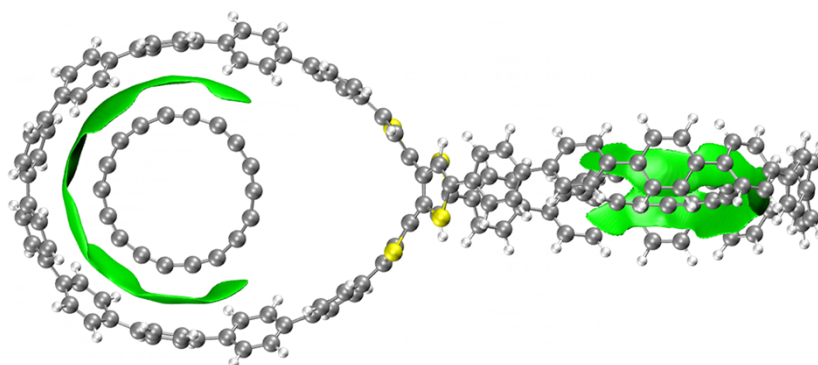

**Fig. S9.** Isosurface map of IGMH of  $S_1$  state of  $2C_{18}@OPP$  with  $\delta g^{\text{inter}}$  isovalue of 0.002 a.u.
